# Supplementary material
Source: PubMed Central journal article supplement (PMC7303946)
Supplement: mmc1.pdf [file mmc1.pdf]

# THE LANCET Oncology

## Supplementary appendix

This appendix formed part of the original submission and has been peer reviewed. We post it as supplied by the authors.

Supplement to: Rogers JP, Chesney E, Oliver D, et al. Psychiatric and neuropsychiatric presentations associated with severe coronavirus infections: a systematic review and meta-analysis with comparison to the COVID-19 pandemic. *Lancet Oncol* 2020; published online May 18. [http://dx.doi.org/10.1016/S2215-0366\(20\)30203-0](http://dx.doi.org/10.1016/S2215-0366(20)30203-0).

## **Appendix**

Psychiatric and neuropsychiatric presentations associated with severe coronavirus infections: a systematic review and meta-analysis with comparison to the COVID-19 pandemic

Jonathan P Rogers, Edward Chesney, Dominic Oliver, Thomas Pollak, Philip McGuire, Paolo Fusar-Poli, Michael Zandi, Glyn Lewis, Anthony S David

**eTable 1.** PRISMA guidelines for meta-analysis and systematic reviews

**eMethods 1.** Full search terms

**eTable 2.** Scoring for Adapted Newcastle Ottawa Scale

**eFigure 1** Forest plot of the mean difference of SF-36 subscales

**eResults 1.** Mean scores on psychiatric symptoms scales post-infection

**eResults 2.** Mean scores on SF-36 subscales post-infection

**eResults 3.** Employment

**eResults 4.** ICU admission and ventilation rates for SARS-CoV-1, MERS and SARS-CoV-2

**eResults 5.** Heterogeneity and sensitivity analyses

**eTable 3.** Results of quality assessment

| <b>eTable 1: PRISMA guidelines for meta-analysis and systematic reviews</b> |          |                                                                                                                                                                                                                                                                                                             |             |
|-----------------------------------------------------------------------------|----------|-------------------------------------------------------------------------------------------------------------------------------------------------------------------------------------------------------------------------------------------------------------------------------------------------------------|-------------|
| <b>Section/topic</b>                                                        | <b>#</b> | <b>Checklist item</b>                                                                                                                                                                                                                                                                                       | <b>Page</b> |
| <b>TITLE</b>                                                                |          |                                                                                                                                                                                                                                                                                                             |             |
| Title                                                                       | 1        | Identify the report as a systematic review, meta-analysis, or both.                                                                                                                                                                                                                                         | 1           |
| <b>ABSTRACT</b>                                                             |          |                                                                                                                                                                                                                                                                                                             |             |
| Structured summary                                                          | 2        | Provide a structured summary including, as applicable: background; objectives; data sources; study eligibility criteria, participants, and interventions; study appraisal and synthesis methods; results; limitations; conclusions and implications of key findings; systematic review registration number. | 1           |
| <b>INTRODUCTION</b>                                                         |          |                                                                                                                                                                                                                                                                                                             |             |
| Rationale                                                                   | 3        | Describe the rationale for the review in the context of what is already known.                                                                                                                                                                                                                              | 2           |
| Objectives                                                                  | 4        | Provide an explicit statement of questions being addressed with reference to participants, interventions, comparisons, outcomes, and study design (PICOS).                                                                                                                                                  | 2           |
| <b>METHODS</b>                                                              |          |                                                                                                                                                                                                                                                                                                             |             |
| Protocol and registration                                                   |          | Indicate if a review protocol exists, if and where it can be accessed (e.g., Web address), and, if available, provide                                                                                                                                                                                       | 3           |

|                                    |    |                                                                                                                                                                                                                        |            |
|------------------------------------|----|------------------------------------------------------------------------------------------------------------------------------------------------------------------------------------------------------------------------|------------|
|                                    | 5  | registration information including registration number.                                                                                                                                                                |            |
| Eligibility criteria               | 6  | Specify study characteristics (e.g., PICOS, length of follow-up) and report characteristics (e.g., years considered, language, publication status) used as criteria for eligibility, giving rationale.                 | 3          |
| Information sources                | 7  | Describe all information sources (e.g., databases with dates of coverage, contact with study authors to identify additional studies) in the search and date last searched.                                             | 3          |
| Search                             | 8  | Present full electronic search strategy for at least one database, including any limits used, such that it could be repeated.                                                                                          | eMethods 1 |
| Study selection                    | 9  | State the process for selecting studies (i.e., screening, eligibility, included in systematic review, and, if applicable, included in the meta-analysis).                                                              | 3          |
| Data collection process            | 10 | Describe method of data extraction from reports (e.g., piloted forms, independently, in duplicate) and any processes for obtaining and confirming data from investigators.                                             | 3          |
| Data items                         | 11 | List and define all variables for which data were sought (e.g., PICOS, funding sources) and any assumptions and simplifications made.                                                                                  | 3/4        |
| Risk of bias in individual studies | 12 | Describe methods used for assessing risk of bias of individual studies (including specification of whether this was done at the study or outcome level), and how this information is to be used in any data synthesis. | 4          |
| Summary measures                   | 13 | State the principal summary measures (e.g., risk ratio, difference in means).                                                                                                                                          | 4          |
| Synthesis of results               | 14 | Describe the methods of handling data and combining results of studies, if done, including measures of consistency (e.g., $I^2$ ) for each meta-analysis.                                                              | 3/4        |
| Risk of bias across studies        | 15 | Specify any assessment of risk of bias that may affect the cumulative evidence (e.g., publication bias, selective reporting within studies).                                                                           | 4          |

|                               |    |                                                                                                                                                                                                          |              |
|-------------------------------|----|----------------------------------------------------------------------------------------------------------------------------------------------------------------------------------------------------------|--------------|
| Additional analyses           | 16 | Describe methods of additional analyses (e.g., sensitivity or subgroup analyses, meta-regression), if done, indicating which were pre-specified.                                                         | 4            |
| <b>RESULTS</b>                | .  |                                                                                                                                                                                                          |              |
| Study selection               | 17 | Give numbers of studies screened, assessed for eligibility, and included in the review, with reasons for exclusions at each stage, ideally with a flow diagram.                                          | 5            |
| Study characteristics         | 18 | For each study, present characteristics for which data were extracted (e.g., study size, PICOS, follow-up period) and provide the citations.                                                             | 6-11         |
| Risk of bias within studies   | 19 | Present data on risk of bias of each study and, if available, any outcome level assessment (see item 12).                                                                                                | 15           |
| Results of individual studies | 20 | For all outcomes considered (benefits or harms), present, for each study: (a) simple summary data for each intervention group (b) effect estimates and confidence intervals, ideally with a forest plot. | eFigure 1    |
| Synthesis of results          | 21 | Present results of each meta-analysis done, including confidence intervals and measures of consistency.                                                                                                  | 13           |
| Risk of bias across studies   | 22 | Present results of any assessment of risk of bias across studies (see Item 15).                                                                                                                          | eResults 1-2 |
| Additional analysis           | 23 | Give results of additional analyses, if done (e.g., sensitivity or subgroup analyses, meta-regression [see Item 16]).                                                                                    | eResults 2   |
| <b>DISCUSSION</b>             | .  |                                                                                                                                                                                                          |              |
| Summary of evidence           | 24 | Summarize the main findings including the strength of evidence for each main outcome; consider their relevance to key groups (e.g., healthcare providers, users, and policy makers).                     | 16           |
| Limitations                   | 25 | Discuss limitations at study and outcome level (e.g., risk of bias), and at review-level (e.g., incomplete retrieval of identified research, reporting bias).                                            | 16/17        |
| Conclusions                   | 26 | Provide a general interpretation of the results in the context of other evidence, and implications for future research.                                                                                  | 17           |

|                |    |                                                                                                                                            |    |
|----------------|----|--------------------------------------------------------------------------------------------------------------------------------------------|----|
| <b>FUNDING</b> | .  |                                                                                                                                            |    |
| Funding        | 27 | Describe sources of funding for the systematic review and other support (e.g., supply of data); role of funders for the systematic review. | 17 |

## eMethods 1. Full search terms

### Medline

((coronavir\* OR alphacoronavirus OR betacoronavirus OR COVID OR COVID-19 OR "severe acute respiratory syndrome" OR SARS OR "Middle East respiratory syndrome" OR MERS OR "infectious bronchitis vir\*" OR "infectious bronchitis").ti,ab OR (exp CORONAVIRIDAE/ OR exp "SEVERE ACUTE RESPIRATORY SYNDROME"/)) AND ((deliri\* OR sleep OR insomnia OR somnolence OR hypersomnolence OR parasomnia OR "movement disorder" OR neuropsych\* OR dement\* OR cogniti\* OR irritability OR hallucinat\* OR delusion\* OR apath\* OR indifference OR agitat\* OR euphori\* OR elation OR elated OR disinhibit\* OR aggressi\* OR amnes\* OR catatoni\* OR personality OR psycho\* OR mental OR mood OR affective OR depress\* OR anxi\* OR "obsessive compulsive" OR OCD OR "panic disorder" OR post-trauma\* OR posttrauma\* OR PTSD OR neurosis OR neurotic OR bipolar OR mania OR manic OR schizophreni\* OR "intelligence quotient" OR IQ OR "mental retardation" OR "intellectual disability" OR "learning disability" OR autis\* OR asperger\* OR "attention deficit" OR ADHD OR hyperactivity OR hyperkinetic OR suicid\* OR emotion\* OR appetite OR fatigu\* OR tired\* OR confus\*).ti,ab OR (exp DELIRIUM/ OR exp SLEEP/ OR exp WAKEFULNESS/ OR exp SLEEP/ OR exp "DISORDERS OF EXCESSIVE SOMNOLENCE"/ OR exp PARASOMNIAS/ OR exp "PSYCHOMOTOR DISORDERS"/ OR exp DEMENTIA/ OR exp "NEUROCOGNITIVE DISORDERS"/ OR exp HALLUCINATIONS/ OR exp DELUSIONS/ OR exp APATHY/ OR exp "PSYCHOMOTOR AGITATION"/ OR exp EUPHORIA/ OR exp AGGRESSION/ OR exp AMNESIA/ OR exp CATATONIA/ OR exp "PERSONALITY DISORDERS"/ OR exp "SCHIZOPHRENIA SPECTRUM AND OTHER PSYCHOTIC DISORDERS"/ OR exp "MENTAL DISORDERS"/ OR exp "MOOD DISORDERS"/ OR exp DEPRESSION/ OR exp ANXIETY/ OR exp "ANXIETY DISORDERS"/ OR exp "OBSESSIVE-COMPULSIVE DISORDER"/ OR exp "PANIC DISORDER"/ OR exp "STRESS DISORDERS, POST-TRAUMATIC"/ OR exp "BIPOLAR AND RELATED DISORDERS"/ OR exp SCHIZOPHRENIA/ OR exp "INTELLECTUAL DISABILITY"/ OR exp "AUTISM SPECTRUM DISORDER"/ OR exp "ASPERGER SYNDROME"/ OR exp "ATTENTION DEFICIT AND DISRUPTIVE BEHAVIOR DISORDERS"/ OR exp "ATTENTION DEFICIT DISORDER WITH HYPERACTIVITY"/ OR exp "MOTOR ACTIVITY"/ OR exp SUICIDE/ OR exp EMOTIONS/ OR exp APPETITE/ OR exp "FEEDING AND EATING DISORDERS"/ OR exp FATIGUE/ OR exp CONFUSION/)) [Humans]

### EMBASE

((coronavir\* OR alphacoronavirus OR betacoronavirus OR COVID OR COVID-19 OR "severe acute respiratory syndrome" OR SARS OR "Middle East respiratory syndrome" OR MERS OR "infectious bronchitis vir\*" OR "infectious bronchitis").ti,ab OR (exp CORONAVIRIDAE/ OR exp "CORONAVIRIDAE INFECTION"/ OR exp "SARS-RELATED CORONAVIRUS"/ OR exp "SEVERE ACUTE RESPIRATORY SYNDROME"/ OR exp "MIDDLE EAST RESPIRATORY SYNDROME"/)) AND ((deliri\* OR sleep OR insomnia OR somnolence OR hypersomnolence OR parasomnia OR "movement disorder" OR neuropsych\* OR dement\* OR cogniti\* OR irritability OR hallucinat\* OR delusion\* OR apath\* OR indifference OR agitat\* OR euphori\* OR elation OR elated OR disinhibit\* OR aggressi\* OR amnes\* OR catatoni\* OR personality OR psycho\* OR mental OR mood OR affective OR depress\* OR anxi\* OR "obsessive compulsive" OR OCD OR "panic disorder" OR post-trauma\* OR posttrauma\* OR PTSD OR neurosis OR neurotic OR bipolar OR mania OR manic OR schizophreni\* OR "intelligence quotient" OR IQ OR "mental retardation" OR "intellectual disability" OR "learning disability" OR autis\* OR asperger\* OR "attention deficit" OR ADHD OR hyperactivity OR hyperkinetic OR suicid\* OR emotion\* OR appetite OR fatigu\* OR tired\* OR confus\*).ti,ab OR (exp DELIRIUM/ OR exp "SLEEP DISORDER"/ OR exp INSOMNIA/ OR exp SOMNOLENCE/ OR exp HYPERSOMNIA/ OR exp PARASOMNIA/ OR exp "MOTOR DYSFUNCTION"/ OR exp DEMENTIA/ OR exp "COGNITIVE DEFECT"/ OR exp IRRITABILITY/ OR exp HALLUCINATION/ OR exp DELUSION/ OR exp APATHY/ OR exp AGITATION/ OR exp EUPHORIA/ OR exp AGGRESSION/ OR exp AMNESIA/ OR exp CATATONIA/ OR exp "PERSONALITY DISORDER"/ OR exp PSYCHOSIS/ OR exp "MENTAL DISEASE"/ OR exp MOOD/ OR exp "MOOD DISORDER"/ OR exp DEPRESSION/ OR exp

ANXIETY/ OR exp "ANXIETY DISORDER"/ OR exp "OBSESSIVE COMPULSIVE DISORDER"/ OR exp PANIC/ OR exp "POSTTRAUMATIC STRESS DISORDER"/ OR exp NEUROSIS/ OR exp "BIPOLAR DISORDER"/ OR exp MANIA/ OR exp PSYCHOSIS/ OR exp "SCHIZOPHRENIA SPECTRUM DISORDER"/ OR exp SCHIZOPHRENIA/ OR exp "INTELLIGENCE QUOTIENT"/ OR exp "MENTAL DISEASE"/ OR exp "INTELLECTUAL IMPAIRMENT"/ OR exp "DISORDERS OF HIGHER CEREBRAL FUNCTION"/ OR exp "LEARNING DISORDER"/ OR exp AUTISM/ OR exp "ATTENTION DEFICIT DISORDER"/ OR exp HYPERACTIVITY/ OR exp "PSYCHOMOTOR DISORDER"/ OR exp HYPERKINESIA/ OR exp SUICIDE/ OR exp "SUICIDAL BEHAVIOR"/ OR exp "SUICIDE ATTEMPT"/ OR exp EMOTION/ OR exp APPETITE/ OR exp "APPETITE DISORDER"/ OR exp FATIGUE/ OR exp CONFUSION/))) [Humans]

### **PsycINFO**

((coronavir\* OR alphacoronavirus OR betacoronavirus OR COVID OR COVID-19 OR "severe acute respiratory syndrome" OR SARS OR "Middle East respiratory syndrome" OR MERS OR "infectious bronchitis vir\*" OR "infectious bronchitis").ti,ab AND ((deliri\* OR sleep OR insomnia OR somnolence OR hypersomnolence OR parasomnia OR "movement disorder" OR neuropsych\* OR dement\* OR cogniti\* OR irritability OR hallucinat\* OR delusion\* OR apath\* OR indifference OR agitat\* OR euphori\* OR elation OR elated OR disinhibit\* OR aggressi\* OR amnes\* OR catatoni\* OR personality OR psycho\* OR mental OR mood OR affective OR depress\* OR anxi\* OR "obsessive compulsive" OR OCD OR "panic disorder" OR post-trauma\* OR posttrauma\* OR PTSD OR neurosis OR neurotic OR bipolar OR mania OR manic OR schizophreni\* OR "intelligence quotient" OR IQ OR "mental retardation" OR "intellectual disability" OR "learning disability" OR autis\* OR asperger\* OR "attention deficit" OR ADHD OR hyperactivity OR hyperkinetic OR suicid\* OR emotion\* OR appetite OR fatigu\* OR tired\* OR confus\*).ti,ab OR (exp DELIRIUM/ OR exp "NEUROCOGNITIVE DISORDERS"/ OR exp "SLEEP WAKE DISORDERS"/ OR exp INSOMNIA/ OR exp HYPERSOMNIA/ OR exp "MOVEMENT DISORDERS"/ OR exp DEMENTIA/ OR exp "COGNITIVE ABILITY"/ OR exp "COGNITIVE IMPAIRMENT"/ OR exp "NEUROCOGNITIVE DISORDERS"/ OR exp IRRITABILITY/ OR exp HALLUCINATIONS/ OR exp DELUSIONS/ OR exp APATHY/ OR exp AGITATION/ OR exp EUPHORIA/ OR exp "BEHAVIORAL DISINHIBITION"/ OR exp AMNESIA/ OR exp CATATONIA/ OR exp PERSONALITY/ OR exp "PERSONALITY DISORDERS"/ OR exp PSYCHOSIS/ OR exp "MENTAL DISORDERS"/ OR exp EMOTIONS/ OR exp "AFFECTIVE DISORDERS"/ OR exp "DEPRESSION (EMOTION)"/ OR exp ANXIETY/ OR exp "ANXIETY DISORDERS"/ OR exp "OBSESSIVE COMPULSIVE DISORDER"/ OR exp "PANIC DISORDER"/ OR exp "POST-TRAUMATIC STRESS"/ OR exp NEUROSIS/ OR exp "BIPOLAR DISORDER"/ OR exp MANIA/ OR exp SCHIZOPHRENIA/ OR exp "INTELLIGENCE QUOTIENT"/ OR exp "NEURODEVELOPMENTAL DISORDERS"/ OR exp "INTELLECTUAL DEVELOPMENT DISORDER"/ OR exp "AUTISM SPECTRUM DISORDERS"/ OR exp "ATTENTION DEFICIT DISORDER"/ OR exp HYPERKINESIS/ OR exp SUICIDE/ OR exp EMOTIONS/ OR exp APPETITE/ OR exp "EATING DISORDERS"/ OR exp FATIGUE/ OR exp "MENTAL CONFUSION"/))) [Population Human]

### **CINAHL**

((coronavir\* OR alphacoronavirus OR betacoronavirus OR COVID OR COVID-19 OR "severe acute respiratory syndrome" OR SARS OR "Middle East respiratory syndrome" OR MERS OR "infectious bronchitis vir\*" OR "infectious bronchitis").ti,ab OR (exp CORONAVIRUS/ OR exp CORONAVIRIDAE/ OR exp "MIDDLE EAST RESPIRATORY SYNDROME CORONAVIRUS"/ OR exp "SARS VIRUS"/)) AND ((deliri\* OR sleep OR insomnia OR somnolence OR hypersomnolence OR parasomnia OR "movement disorder" OR neuropsych\* OR dement\* OR cogniti\* OR irritability OR hallucinat\* OR delusion\* OR apath\* OR indifference OR agitat\* OR euphori\* OR elation OR elated OR disinhibit\* OR aggressi\* OR amnes\* OR catatoni\* OR personality OR psycho\* OR mental OR mood OR affective OR depress\* OR anxi\* OR "obsessive compulsive" OR OCD OR "panic disorder" OR post-trauma\* OR posttrauma\* OR PTSD OR neurosis OR neurotic OR bipolar OR mania OR manic OR schizophreni\* OR "intelligence quotient" OR IQ



OR "mental retardation" OR "intellectual disability" OR "learning disability" OR autism\* OR asperger\* OR "attention deficit" OR ADHD OR hyperactivity OR hyperkinetic OR suicid\* OR emotion\* OR appetite OR fatigu\* OR tired\* OR confus\*).ti,ab OR (exp DELIRIUM/ OR exp SLEEP/ OR exp "SLEEP DISORDERS"/ OR exp INSOMNIA/ OR exp "DISORDERS OF EXCESSIVE SOMNOLENCE"/ OR exp PARASOMNIAS/ OR exp "MOVEMENT DISORDERS"/ OR exp DEMENTIA/ OR exp "COGNITION DISORDERS"/ OR exp "DELIRIUM, DEMENTIA, AMNESTIC, COGNITIVE DISORDERS"/ OR exp HALLUCINATIONS/ OR exp DELUSIONS/ OR exp APATHY/ OR exp AGITATION/ OR exp AGGRESSION/ OR exp AMNESIA/ OR exp "MEMORY DISORDERS"/ OR exp CATATONIA/ OR exp PERSONALITY/ OR exp "PERSONALITY DISORDERS"/ OR exp "PERSONALITY DISORDERS"/ OR exp "PERSONALITY DISORDERS"/ OR exp "PSYCHOTIC DISORDERS"/ OR exp "MENTAL DISORDERS"/ OR exp "AFFECTIVE SYMPTOMS"/ OR exp "AFFECTIVE DISORDERS"/ OR exp DEPRESSION/ OR exp ANXIETY/ OR exp "ANXIETY DISORDERS"/ OR exp "NEUROTIC DISORDERS"/ OR exp "OBSESSIVE-COMPULSIVE DISORDER"/ OR exp "PANIC DISORDER"/ OR exp "STRESS DISORDERS, POST-TRAUMATIC"/ OR exp "BIPOLAR DISORDER"/ OR exp SCHIZOPHRENIA/ OR exp "INTELLECTUAL DISABILITY"/ OR exp "AUTISTIC DISORDER"/ OR exp "CHILD DEVELOPMENT DISORDERS, PERVASIVE"/ OR exp "ASPERGER SYNDROME"/ OR exp "ATTENTION DEFICIT HYPERACTIVITY DISORDER"/ OR exp HYPERKINESIS/ OR exp "MOTOR ACTIVITY"/ OR exp SUICIDE/ OR exp EMOTIONS/ OR exp APPETITE/ OR exp "EATING DISORDERS"/ OR exp FATIGUE/ OR exp CONFUSION/))

#### **PsyArXiv**

Terms: coronavirus OR covid OR "covid-19"

From inception to date (5 hits; all since March 2020)

Search completed on 17/3/20

#### **bioRxiv and medRxiv**

Terms: for full text or abstract or title "coronavirus, covid-19" (match whole any) and posted between "01 Jan, 2020 and 17 Mar, 2020"

627 hits at 10.30pm on 17/3/2020

**eTable 2.** Scoring for Adapted Newcastle Ottawa Scale

|                      |                                                         |                                                                                                                                                                                                                                                                                                        |
|----------------------|---------------------------------------------------------|--------------------------------------------------------------------------------------------------------------------------------------------------------------------------------------------------------------------------------------------------------------------------------------------------------|
| <b>Selection 1</b>   | Representativeness of cohort                            | <ul style="list-style-type: none"> <li>1) Typical hospitalised coronavirus</li> <li>0) &lt;70% recruitment or &gt;30% lost</li> <li>0) community cases</li> <li>0) Intensive care only</li> <li>0) Healthcare workers only</li> <li>0) ITU</li> </ul>                                                  |
| <b>Selection 2</b>   | Standard Criteria, and does not include suspected cases | <ul style="list-style-type: none"> <li>1) Probable/Confirmed only according to WHO/CDC/relevant criteria</li> <li>0) Suspected</li> </ul>                                                                                                                                                              |
| <b>Selection 3</b>   | Ascertainment of exposure                               | <ul style="list-style-type: none"> <li>1) Lab verification</li> <li>0) No lab test</li> </ul>                                                                                                                                                                                                          |
| <b>Selection 4</b>   | Outcome of interest was not present at start of study   | <ul style="list-style-type: none"> <li>1) Psychiatric assessment pre-coronavirus</li> <li>0) No psychiatric assessment</li> </ul>                                                                                                                                                                      |
| <b>Comparability</b> | Control group?                                          | <ul style="list-style-type: none"> <li>2) Well matched healthy controls</li> <li>1) Age-matched normative data; poorly matched healthy controls</li> <li>0) drawn from a different source</li> <li>0) no description of the derivation of the non-exposed cohort</li> <li>0) normative data</li> </ul> |
| <b>Outcome 1</b>     | Systematic assessment                                   | <ul style="list-style-type: none"> <li>1) All participants assessed</li> <li>0) Targeted/unstructured</li> </ul>                                                                                                                                                                                       |

**Outcome 2**    Quality of assessment

- 1) Clinician diagnosis using ICD-10/DSMIV
- 1) Systematic symptoms assessment
- 1) Standardised rating scales
- 1) High-quality qualitative methods
- 0) Scales only used to obtain diagnosis i.e. not also in a normal way
- 0) Unstructured reporting of diagnosis, symptoms or severity

---

**Outcome 3**    Follow-up

- 1) Same time-point for all, adequate follow-up time adequate
- 0) Follow-up <3 months
- 0) Not all patients discharged/dead

**eFigure 1** Forest plot of the mean difference of SF-36 subscales **A** social functioning, **B** role limitation due to emotional problems, and **C** mental health

**A**

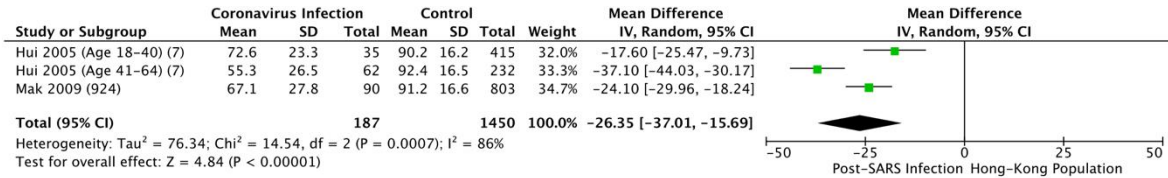

**B**

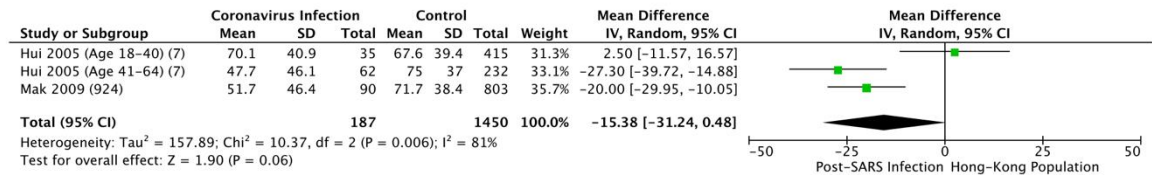

**C**

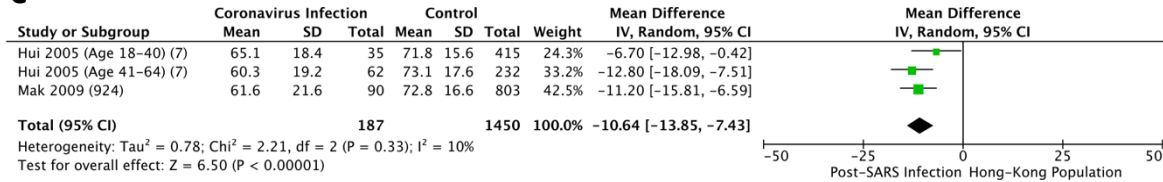

**eResults 1.** Mean scores on psychiatric symptoms scales post-infection **A** anxiety, **B** depression, **C** PTSD, **D** PTSD intrusion, **E** PTSD avoidance, and **F** PTSD hyperarousal

| <b>Anxiety symptoms</b> |              |                |                           |          |             |           |
|-------------------------|--------------|----------------|---------------------------|----------|-------------|-----------|
| <b>Study</b>            | <b>Virus</b> | <b>Scale</b>   | <b>Follow-up (months)</b> | <b>n</b> | <b>Mean</b> | <b>SD</b> |
| Lam 2009                | SARS-CoV-1   | HADS (anxiety) | 41.3 (range 31-51)        | 170      | 7.6         | 4.4       |
| Kwek 2006               | SARS-CoV-1   | HADS (anxiety) | 3                         | 63       | 6.2         | 4.5       |
| Wu 2005                 | SARS-CoV-1   | HADS (anxiety) | 3                         | 131      | 5.19        | 4.48      |

| <b>Depression symptoms</b> |              |                   |                           |          |             |           |
|----------------------------|--------------|-------------------|---------------------------|----------|-------------|-----------|
| <b>Study</b>               | <b>Virus</b> | <b>Scale</b>      | <b>Follow-up (months)</b> | <b>n</b> | <b>Mean</b> | <b>SD</b> |
| Lam 2009                   | SARS-CoV-1   | HADS (depression) | 41.3 (range 31-51)        | 170      | 7.4         | 4.5       |
| Kwek 2006                  | SARS-CoV-1   | HADS (depression) | 3                         | 63       | 4.9         | 4.1       |
| Wu 2005                    | SARS-CoV-1   | HADS (depression) | 3                         | 131      | 5.17        | 4.33      |

| <b>PTSD symptoms</b> |              |               |                           |          |             |           |
|----------------------|--------------|---------------|---------------------------|----------|-------------|-----------|
| <b>Study</b>         | <b>Virus</b> | <b>Scale</b>  | <b>Follow-up (months)</b> | <b>n</b> | <b>Mean</b> | <b>SD</b> |
| Lee 2019             | MERS         | IES-R (total) | 18                        | 52       | 19.29       | 21.03     |
| Kwek 2006            | SARS-CoV-1   | IES (total)   | 3                         | 63       | 21.8        | 16.3      |

| <b>PTSD intrusion symptoms</b> |              |                   |                           |          |             |           |
|--------------------------------|--------------|-------------------|---------------------------|----------|-------------|-----------|
| <b>Study</b>                   | <b>Virus</b> | <b>Scale</b>      | <b>Follow-up (months)</b> | <b>n</b> | <b>Mean</b> | <b>SD</b> |
| Lam 2009                       | SARS-CoV-1   | IES-R (intrusion) | 41.3 (range 31-51)        | 170      | 13.28       | 8         |
| Lee 2007                       | SARS-CoV-1   | IES-R (intrusion) | 12                        | 96       | 11.2        | 7.2       |
| Wu 2005                        | SARS-CoV-1   | IES-R (intrusion) | 3                         | 131      | 7.28        | 5.84      |

| <b>PTSD avoidance symptoms</b> |              |                   |                           |          |             |           |
|--------------------------------|--------------|-------------------|---------------------------|----------|-------------|-----------|
| <b>Study</b>                   | <b>Virus</b> | <b>Scale</b>      | <b>Follow-up (months)</b> | <b>n</b> | <b>Mean</b> | <b>SD</b> |
| Lam 2009                       | SARS-CoV-1   | IES-R (avoidance) | 41.3 (range 31-51)        | 170      | 10.16       | 7.76      |
| Lee 2007                       | SARS-CoV-1   | IES-R (avoidance) | 12                        | 96       | 8.8         | 6.4       |
| Wu 2005                        | SARS-CoV-1   | IES-R (avoidance) | 3                         | 131      | 6.96        | 5.76      |

| <b>PTSD hyperarousal symptoms</b> |              |                      |                           |          |             |           |
|-----------------------------------|--------------|----------------------|---------------------------|----------|-------------|-----------|
| <b>Study</b>                      | <b>Virus</b> | <b>Scale</b>         | <b>Follow-up (months)</b> | <b>n</b> | <b>Mean</b> | <b>SD</b> |
| Lam 2009                          | SARS-CoV-1   | IES-R (hyperarousal) | 41.3 (range 31-51)        | 170      | 10.56       | 6.24      |
| Lee 2007                          | SARS-CoV-1   | IES-R (hyperarousal) | 12                        | 96       | 7.8         | 5.4       |
| Wu 2005                           | SARS-CoV-1   | IES-R (hyperarousal) | 3                         | 131      | 5.1         | 4.44      |

**eResults 2.** Mean scores on SF-36 subscales post infection **A** social functioning, **B** role limitation due to emotional problems, and **C** mental health

| <b>Quality of Life - Social Functioning</b> |              |                           |                           |          |             |           |
|---------------------------------------------|--------------|---------------------------|---------------------------|----------|-------------|-----------|
| <b>Study</b>                                | <b>Virus</b> | <b>Scale</b>              | <b>Follow-up (months)</b> | <b>n</b> | <b>Mean</b> | <b>SD</b> |
| Hui 2005                                    | SARS-CoV-1   | SF-36: Social Functioning | 12                        | 19       | 72.4        | 24.1      |
| Hui 2005                                    | SARS-CoV-1   | SF-36: Social Functioning | 12                        | 12       | 70.8        | 27.9      |
| Hui 2005                                    | SARS-CoV-1   | SF-36: Social Functioning | 12                        | 50       | 72.8        | 23.1      |
| Hui 2005                                    | SARS-CoV-1   | SF-36: Social Functioning | 12                        | 16       | 51.6        | 25        |
| Mak 2009                                    | SARS-CoV-1   | SF-36: Social Functioning | 18                        | 143      | 68.25       | 27        |
| Lam 2006                                    | SARS-CoV-1   | SF-36: Social Functioning | 2                         | 110      | 55.23       | 29.44     |
| Hong 2009                                   | SARS-CoV-1   | SF-36: Social Functioning | 10                        | 22       | 50.66       | 31.31     |
| Hong 2009                                   | SARS-CoV-1   | SF-36: Social Functioning | 10                        | 35       | 80.15       | 25.58     |
| Mak 2009                                    | SARS-CoV-1   | SF-36: Social Functioning | 30                        | 90       | 67.07       | 27.81     |
| Kwek 2006                                   | SARS-CoV-1   | SF-36: Social Functioning | 3                         | 6        | 79.6        | 28.4      |
| Batawi 2019                                 | MERS         | SF-36: Social Functioning | 12                        | 78       | 84.45       | 24.36     |

| <b>Quality of Life - Role Limitation Due to Emotional Problems</b> |              |                                                  |                           |          |             |           |
|--------------------------------------------------------------------|--------------|--------------------------------------------------|---------------------------|----------|-------------|-----------|
| <b>Study</b>                                                       | <b>Virus</b> | <b>Scale</b>                                     | <b>Follow-up (months)</b> | <b>n</b> | <b>Mean</b> | <b>SD</b> |
| Hui 2005                                                           | SARS-CoV-1   | SF-36: Role Limitation Due to Emotional Problems | 12                        | 19       | 71.9        | 42        |
| Hui 2005                                                           | SARS-CoV-1   | SF-36: Role Limitation Due to Emotional Problems | 12                        | 12       | 55.6        | 43.4      |
| Hui 2005                                                           | SARS-CoV-1   | SF-36: Role Limitation Due to Emotional Problems | 12                        | 50       | 68          | 40.9      |
| Hui 2005                                                           | SARS-CoV-1   | SF-36: Role Limitation Due to Emotional Problems | 12                        | 16       | 45.8        | 46.9      |
| Mak 2009                                                           | SARS-CoV-1   | SF-36: Role Limitation Due to Emotional Problems | 18                        | 143      | 3.59        | 1.07      |
| Lam 2006                                                           | SARS-CoV-1   | SF-36: Role Limitation Due to Emotional Problems | 2                         | 112      | 37.5        | 40.3      |
| Hong 2009                                                          | SARS-CoV-1   | SF-36: Role Limitation Due to Emotional Problems | 10                        | 22       | 33.33       | 41.57     |
| Hong 2009                                                          | SARS-CoV-1   | SF-36: Role Limitation Due to Emotional Problems | 10                        | 35       | 89.22       | 26.87     |
| Mak 2009                                                           | SARS-CoV-1   | SF-36: Role Limitation Due to Emotional Problems | 30                        | 90       | 51.7        | 46.35     |
| Kwek 2006                                                          | SARS-CoV-1   | SF-36: Role Limitation Due to Emotional Problems | 3                         | 6        | 77.8        | 40.4      |
| Batawi 2019                                                        | MERS         | SF-36: Role Limitation Due to Emotional Problems | 12                        | 78       | 75.12       | 36.39     |

| <b>Quality of Life - Mental Health</b> |              |                      |                           |          |             |           |
|----------------------------------------|--------------|----------------------|---------------------------|----------|-------------|-----------|
| <b>Study</b>                           | <b>Virus</b> | <b>Scale</b>         | <b>Follow-up (months)</b> | <b>n</b> | <b>Mean</b> | <b>SD</b> |
| Hui 2005                               | SARS-CoV-1   | SF-36: Mental Health | 12                        | 19       | 63.4        | 18.3      |
| Hui 2005                               | SARS-CoV-1   | SF-36: Mental Health | 12                        | 12       | 66.3        | 20.6      |
| Hui 2005                               | SARS-CoV-1   | SF-36: Mental Health | 12                        | 50       | 67.2        | 18.8      |
| Hui 2005                               | SARS-CoV-1   | SF-36: Mental Health | 12                        | 16       | 58.8        | 18.8      |
| Mak 2009                               | SARS-CoV-1   | SF-36: Mental Health | 18                        | 143      | 3.45        | 0.82      |
| Lam 2006                               | SARS-CoV-1   | SF-36: Mental Health | 2                         | 112      | 64.68       | 21.36     |
| Hong 2009                              | SARS-CoV-1   | SF-36: Mental Health | 10                        | 22       | 54.11       | 19.43     |
| Hong 2009                              | SARS-CoV-1   | SF-36: Mental Health | 10                        | 35       | 80          | 15.94     |

|             |            |                      |    |    |       |       |
|-------------|------------|----------------------|----|----|-------|-------|
| Mak 2009    | SARS-CoV-1 | SF-36: Mental Health | 30 | 90 | 61.62 | 21.57 |
| Kwek 2006   | SARS-CoV-1 | SF-36: Mental Health | 3  | 6  | 88    | 15.8  |
| Batawi 2019 | MERS       | SF-36: Mental Health | 12 | 78 | 79.64 | 22.34 |

### eResults 3. Employment

| <b>Employment</b> |              |                           |          |                       |
|-------------------|--------------|---------------------------|----------|-----------------------|
| <b>Study</b>      | <b>Virus</b> | <b>Follow-up (months)</b> | <b>n</b> | <b>Employed n (%)</b> |
| Mak 2009          | SARS-Cov-1   | 18                        | 143      | 94 (66%)              |
| Guo 2019          | SARS-Cov-1   | 144                       | 67       | 62 (93%)              |
| Lee 2019          | MERS         | 12                        | 52       | 43 (83%)              |
| Lam 2009          | SARS-Cov-1   | 41.3                      | 170      | 116 (68%)             |
| Tansey 2007       | SARS-Cov-1   | 1                         | 107      | 79 (74%)              |
| Ngai 2010         | SARS-Cov-1   | 24                        | 41       | 32 (78%)              |



**eResults 4.** ICU admission and ventilation rates for SARS-CoV-1, MERS and SARS-CoV-2

**SARS-CoV-1** ICU admission rate: 12.8% (k = 5, n=37, 95% CI 6.9% to 22.5%)

**SARS-CoV-1** ventilation rate: 6.5% (k=5, n=15, 95% CI 3.4% to 11.9%)

**MERS** ICU admission rate: 59.8% (k = 2, n=102, 95% CI 38.9% to 77.6%)

**MERS** ventilation rate: 50.8% (k = 3, n=113, 95% CI 30.5% to 70.1%)

**SARS-CoV-2** ICU admission rate: 18.3% (k = 4, n=93, 95% CI 13.3% to 24.6%)

**SARS-CoV-2** ventilation rate: 5.8% (k = 4, n=22, 95% CI 1.6% to 19.0%)

**eResults 5. Heterogeneity and sensitivity analyses**

**Anxiety:** Heterogeneity was low ( $I^2 = 0$ ) with no studies significantly changing the summary effect if excluded in sensitivity analyses ( $p > 0.05$ ).

**Depression:** Heterogeneity was low ( $I^2 = 0$ ) with no studies significantly changing the summary effect if excluded in sensitivity analyses ( $p > 0.05$ ).

**PTSD:** Heterogeneity was high ( $I^2 = 80\%$ ) with all studies significantly changing the summary effect if excluded in sensitivity analyses ( $p < 0.001$ ). Despite heterogeneity being high, there were not sufficient studies to conduct meta-regression to explain this variance.

**eTable 3.** Results of quality assessment

|    | <b>First author</b> | <b>Year</b> | <b>Title</b>                                                                                                                                                                                                       | <b>Quality category:<br/>Low 0-3<br/>Medium 4-6<br/>High 7-9</b> |
|----|---------------------|-------------|--------------------------------------------------------------------------------------------------------------------------------------------------------------------------------------------------------------------|------------------------------------------------------------------|
| 1  | Hui                 | 2005        | The 1-year impact of severe acute respiratory syndrome on pulmonary function, exercise capacity, and quality of life in a cohort of survivors.                                                                     | medium                                                           |
| 2  | Mak                 | 2009        | Social support and psychological adjustment to SARS: the mediating role of self-care self-efficacy.                                                                                                                | low                                                              |
| 3  | Avendano            | 2003        | Clinical course and management of SARS in health care workers in Toronto: a case series.                                                                                                                           | low                                                              |
| 4  | Koller              | 2006        | When family-centered care is challenged by infectious disease: pediatric health care delivery during the SARS outbreaks.                                                                                           | medium                                                           |
| 5  | Wing                | 2012        | Mental health impact of severe acute respiratory syndrome: a prospective study.                                                                                                                                    | low                                                              |
| 6  | Han                 | 2003        | A follow-up study of 69 discharged SARS patients.                                                                                                                                                                  | low                                                              |
| 7  | Tso                 | 2004        | Persistence of physical symptoms in and abnormal laboratory findings for survivors of severe acute respiratory syndrome.                                                                                           | low                                                              |
| 8  | Lo                  | 2005        | Autonomic dysfunction in recovered severe acute respiratory syndrome patients.                                                                                                                                     | high                                                             |
| 9  | Lam                 | 2006        | The validity and reliability of the functional impairment checklist (FIC) in the evaluation of functional consequences of severe acute respiratory distress syndrome (SARS).                                       | low                                                              |
| 10 | Almutairi           | 2018        | "It feels like I'm the dirtiest person in the world.": Exploring the experiences of healthcare providers who survived MERS-CoV in Saudi Arabia.                                                                    | medium                                                           |
| 11 | Chen                | 2020        | Epidemiological and clinical characteristics of 99 cases of 2019 novel coronavirus pneumonia in Wuhan, China: a descriptive study.                                                                                 | low                                                              |
| 12 | Guo                 | 2019        | Long-term outcomes in patients with severe acute respiratory syndrome treated with oseltamivir: A 12-year longitudinal study                                                                                       | medium                                                           |
| 13 | Lee                 | 2019        | Depression as a mediator of chronic fatigue and post-traumatic stress symptoms in middle east respiratory syndrome survivors                                                                                       | medium                                                           |
| 14 | Hong                | 2018        | Predictors of mortality in Middle East respiratory syndrome (MERS)                                                                                                                                                 | medium                                                           |
| 15 | Kim                 | 2018        | Psychiatric findings in suspected and confirmed middle east respiratory syndrome patients quarantined in hospital: A retrospective chart analysis                                                                  | medium                                                           |
| 16 | Alhumaid            | 2018        | MERS-coV transmitted from animal-to-human vs MERS-CoV transmitted from human-to-human: Comparison of virulence and therapeutic outcomes in a Saudi Hospital                                                        | medium                                                           |
| 17 | Lee                 | 2017        | The clinical and virological features of the first imported case causing MERS-CoV outbreak in South Korea, 2015                                                                                                    | medium                                                           |
| 18 | Mak                 | 2010        | Risk factors for chronic post-traumatic stress disorder (PTSD) in SARS survivors.                                                                                                                                  | medium                                                           |
| 19 | Yoon                | 2016        | System effectiveness of detection, brief intervention and refer to treatment for the people with post-traumatic emotional distress by MERS: A case report of community-based proactive intervention in South Korea | low                                                              |
| 20 | Siu                 | 2016        | Coping with future epidemics: Tai chi practice as an overcoming strategy used by survivors of severe acute respiratory syndrome (SARS) in post-SARS Hong Kong                                                      | low                                                              |
| 21 | Noorwali            | 2015        | Descriptive epidemiology and characteristics of confirmed cases of Middle East respiratory syndrome coronavirus infection in the Makkah Region of Saudi Arabia, March to June 2014                                 | medium                                                           |
| 22 | Saad                | 2014        | Clinical aspects and outcomes of 70 patients with Middle East respiratory syndrome coronavirus infection: A single-center experience in Saudi Arabia                                                               | low                                                              |
| 23 | Guery               | 2013        | Clinical features and viral diagnosis of two cases of infection with Middle East Respiratory Syndrome coronavirus: A report of nosocomial transmission                                                             | low                                                              |
| 24 | Moldofsky           | 2011        | Chronic widespread musculoskeletal pain, fatigue, depression and disordered sleep in chronic post-SARS syndrome; a case-controlled study                                                                           | low                                                              |
| 25 | Lam                 | 2009        | Mental morbidities and chronic fatigue in severe acute respiratory syndrome survivors long-term follow-up                                                                                                          | low                                                              |
| 26 | Hong                | 2009        | Posttraumatic stress disorder in convalescent severe acute respiratory syndrome patients: a 4-year follow-up study                                                                                                 | medium                                                           |
| 27 | Mak                 | 2009        | Long-term psychiatric morbidities among SARS survivors                                                                                                                                                             | high                                                             |
| 28 | Siu                 | 2008        | The sars-associated stigma of SARS victims in the post-sars Era of Hong Kong                                                                                                                                       | low                                                              |
| 29 | Bonanno             | 2008        | Psychological Resilience and Dysfunction Among Hospitalized Survivors of the SARS Epidemic in Hong Kong: A Latent Class Approach                                                                                   | medium                                                           |

|    |           |      |                                                                                                                                                                                                 |        |
|----|-----------|------|-------------------------------------------------------------------------------------------------------------------------------------------------------------------------------------------------|--------|
| 30 | Lee       | 2007 | Stress and psychological distress among SARS survivors 1 year after the outbreak                                                                                                                | low    |
| 31 | Tansey    | 2007 | One-year outcomes and health care utilization in survivors of severe acute respiratory syndrome                                                                                                 | medium |
| 32 | Mok       | 2005 | An exploratory study of nurses suffering from severe acute respiratory syndrome (SARS)                                                                                                          | low    |
| 33 | Wu        | 2005 | Posttraumatic stress, anxiety, and depression in survivors of severe acute respiratory syndrome (SARS)                                                                                          | low    |
| 34 | MacKay    | 2005 | Adverse drug reactions associated with the use of ribavirin in the treatment of severe acute respiratory syndrome (SARS)                                                                        | low    |
| 35 | Kwek      | 2006 | Quality of life and psychological status in survivors of severe acute respiratory syndrome at 3 months postdischarge                                                                            | medium |
| 36 | Lau       | 2005 | Tachycardia amongst subjects recovering from severe acute respiratory syndrome (SARS)                                                                                                           | low    |
| 37 | Leow      | 2005 | Hypocortisolism in survivors of severe acute respiratory syndrome (SARS)                                                                                                                        | low    |
| 38 | Lee       | 2005 | The experience of SARS-related stigma at Amoy Gardens                                                                                                                                           | low    |
| 39 | Wu        | 2005 | Posttraumatic stress after SARS                                                                                                                                                                 | low    |
| 40 | Sheng     | 2005 | The effects of disease severity, use of corticosteroids and social factors on neuropsychiatric complaints in severe acute respiratory syndrome (SARS) patients at acute and convalescent phases | low    |
| 41 | Leung     | 2004 | Severe acute respiratory syndrome among children                                                                                                                                                | low    |
| 42 | Tiwari    | 2003 | Severe acute respiratory syndrome (SARS) in Hong Kong: Patients' experiences                                                                                                                    | low    |
| 43 | Cheng     | 2004 | Adjustment outcomes in Chinese patients following one-month recovery from severe acute respiratory syndrome in Hong Kong                                                                        | medium |
| 44 | Cheng     | 2004 | Psychological distress and negative appraisals in survivors of severe acute respiratory syndrome (SARS)                                                                                         | medium |
| 45 | Li        | 2004 | Long-term sequelae of SARS in children                                                                                                                                                          | low    |
| 46 | Lee       | 2004 | Factors associated with psychosis among patients with severe acute respiratory syndrome: A case-control study                                                                                   | low    |
| 47 | Cheng     | 2004 | Psychiatric complications in patients with severe acute respiratory syndrome (SARS) during the acute treatment phase: A series of 10 cases                                                      | medium |
| 48 | Lau       | 2004 | Outcome of coronavirus-associated severe acute respiratory syndrome using a standard treatment protocol                                                                                         | medium |
| 49 | Chua      | 2004 | Stress and psychological impact on SARS patients during the outbreak                                                                                                                            | medium |
| 50 | Loutfy    | 2003 | Interferon Alfacon-1 Plus Corticosteroids in Severe Acute Respiratory Syndrome: A Preliminary Study                                                                                             | medium |
| 51 | Maunder   | 2003 | The immediate psychological and occupational impact of the 2003 SARS outbreak in a teaching hospital                                                                                            | low    |
| 52 | Cheng,    | 2006 | Adjustment to severe acute respiratory syndrome (SARS): Roles of appraisal and post-traumatic growth                                                                                            | low    |
| 53 | Batawi,   | 2019 | Quality of life reported by survivors after hospitalization for Middle East Respiratory Syndrome (MERS)                                                                                         | medium |
| 54 | Jeong,    | 2016 | Mental health status of people isolated due to Middle East Respiratory Syndrome.                                                                                                                | medium |
| 55 | Arabi,    | 2015 | Severe neurologic syndrome associated with Middle East respiratory syndrome corona virus (MERS-CoV).                                                                                            | low    |
| 56 | Schneider | 2004 | SARS in pregnancy: this case study explores the first documented infection in the U.S.                                                                                                          | low    |
| 57 | JENNY     | 2010 | The long-term impact of severe acute respiratory syndrome on pulmonary function, exercise capacity and health status                                                                            | medium |
| 58 | Hui,      | 2005 | Impact of severe acute respiratory syndrome (SARS) on pulmonary function, functional capacity and quality of life in a cohort of survivors                                                      | high   |
| 59 | Lau,      | 2005 | The impact of severe acute respiratory syndrome on the physical profile and quality of life                                                                                                     | medium |
| 60 | Li,       | 2006 | Long-term outcome of acute respiratory distress syndrome caused by severe acute respiratory syndrome (SARS): An observational study                                                             | medium |
| 61 | Chen      | 2020 | Clinical and immunologic features in severe and moderate forms of Coronavirus Disease 2019                                                                                                      | low    |
| 62 | Zhang     | 2020 | Clinical characteristics of 82 death cases with COVID-19                                                                                                                                        | medium |
| 63 | Qi        | 2020 | Epidemiological and clinical features of 2019-nCoV acute respiratory disease cases in Chongqing municipality, China: a retrospective, descriptive, multiple-center study                        | medium |
| 64 | Ying      | 2020 | Clinical characteristics of 36 non-survivors with COVID-19 in Wuhan, China                                                                                                                      | low    |
| 65 | Ling      | 2020 | Neurological Manifestations of Hospitalized Patients with COVID-19 in Wuhan, China: a retrospective case series study                                                                           | medium |

|    |           |      |                                                                                                                                                  |        |
|----|-----------|------|--------------------------------------------------------------------------------------------------------------------------------------------------|--------|
| 66 | Lau       | 2021 | A randomised controlled trial of the effectiveness of an exercise training program in patients recovering from severe acute respiratory syndrome | medium |
| 67 | Leung     | 2020 | A territory-wide study of early COVID-19 outbreak in Hong Kong community: A clinical, epidemiological and phylogenomic investigation             | medium |
| 68 | Fu        | 2020 | Virologic and clinical characteristics for prognosis of severe COVID-19: a retrospective observational study in Wuhan, China                     | low    |
| 69 | Kong      | 2020 | Prevalence and Factors Associated with Depression and Anxiety of Hospitalized Patients with COVID-19                                             | medium |
| 70 | Yang      | 2020 | Analysis of psychological state and clinical psychological intervention model of patients with COVID-19                                          | high   |
| 71 | Moriguchi | 2020 | A first Case of Meningitis/Encephalitis associated with SARS-Coronavirus-2                                                                       | Medium |
| 72 | Helms     | 2020 | Neurologic Features in Severe SARS-CoV-2 Infection                                                                                               | Medium |
